# Supplementary material for: Ultrafast Optical Control of Surface and Bulk Magnetism in Magnetic Topological Insulator/Antiferromagnet Heterostructure
Source: Research Square preprint supplement (doi:10.21203/rs.3.rs-1409876/v1), 2022-03-07
Supplement: Supplementary file 1 [file 30c3ac4b57380723f4960487.docx]

**Supplementary:** Ultrafast Optical Control of Surface and Bulk Magnetism in Magnetic Topological Insulator/Antiferromagnet Heterostructure

Peiwen Liu1, Chris Eckberg2,3,4,5, Lei Pan2, Peng Zhang2, Kang L. Wang2 and Gunter Lüpke1,*

1 Department of Applied Science, The College of William and Mary, Williamsburg, Virginia 23187, USA

2 Department of Electrical Engineering, University of California, Los Angeles, California 90095, USA.

3 Fibertek Inc., Herndon, VA 20171

4 DEVCOM Army Research Laboratory, Adelphi, Maryland 20783

5 DEVCOM Army Research Laboratory, Playa Vista, California 90094

*email: [gxluep@wm.edu](mailto:gxluep@wm.edu)

**Temperature-dependent static MOKE results**

The static magnetic properties of the Cr-(Bi,Sb)2Te3/CrSb heterostructures are studied by polar magneto-optical Kerr effect (MOKE) measurements with applied magnetic field canted 20 from the film surface normal (Fig. S1). The static MOKE hysteresis loops show perfect squareness at 78 K after subtraction of the slanted background signal, indicating a well-developed ferromagnetic order of the MTI layer. The slanted background signal may originate from the CrSb layer. Under the relatively low external field (< 0.2 T) and due to the large proximity effect with the CrSb layer, the effective magnetization of the MTI layer, which has rugged perpendicular anisotropy, is only slightly canted from the out-of-plane direction. As shown in Fig. S1, the ferromagnetic ordering of MTI layer disappears at a temperature of 120 K to 140 K.

**
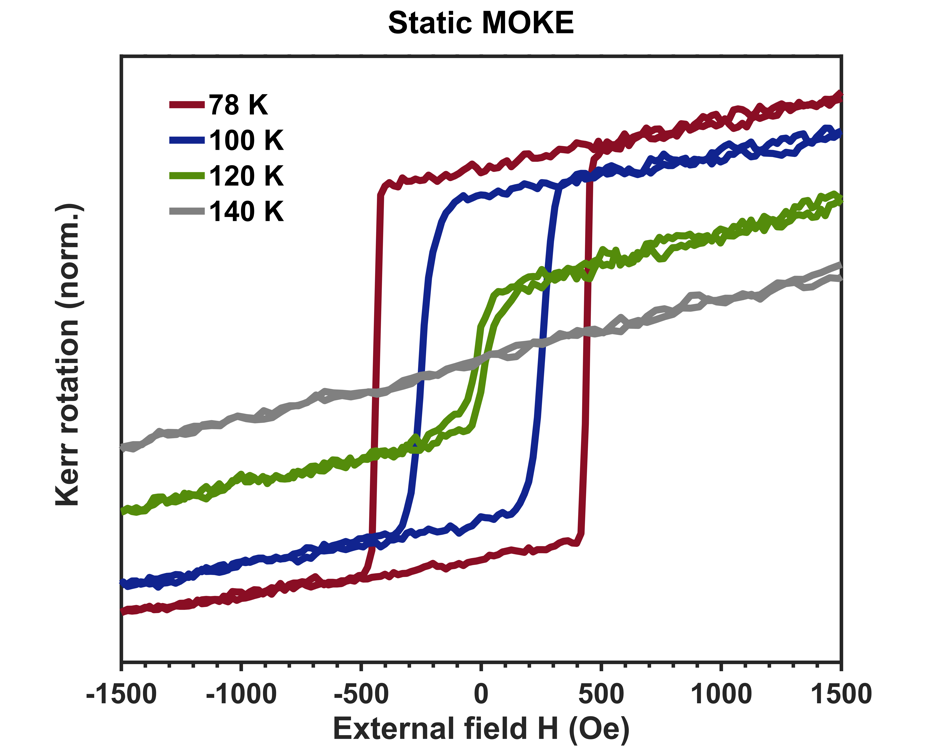
**

**Figure S1 | Static MOKE data.** Temperature dependent hysteresis loops obtained with static MOKE measurements. The results are normalized with respect to the 78 K data.

**Pump-modulated MOKE results**

The pump-modulated MOKE results are shown in Fig. S2 with pump fluences from 10 153 J/cm2. The static MOKE signal for comparison is mV. When the pump fluence reaches 67 J/cm2, the MOKE signal starts to saturate and a spin-valve-like magnetization behavior is revealed. The dynamical magnetization enhancement is valued by the magnitude of transient MOKE loops, which is then combined with the static MOKE signal for the quantitive analysis. The data of dynamical exchange bias effect are obtained by extracting the maximum field offsets of the original the flipped loops. The magnitude of the pump-induced Kerr signal as a function of pump fluence is plotted in Fig. S3. While the transient Kerr signal increases monotonically with increasing pump fluence, at higher pump intensities, the increasing tendency retards and the change of Kerr signal approaches a level of saturation.


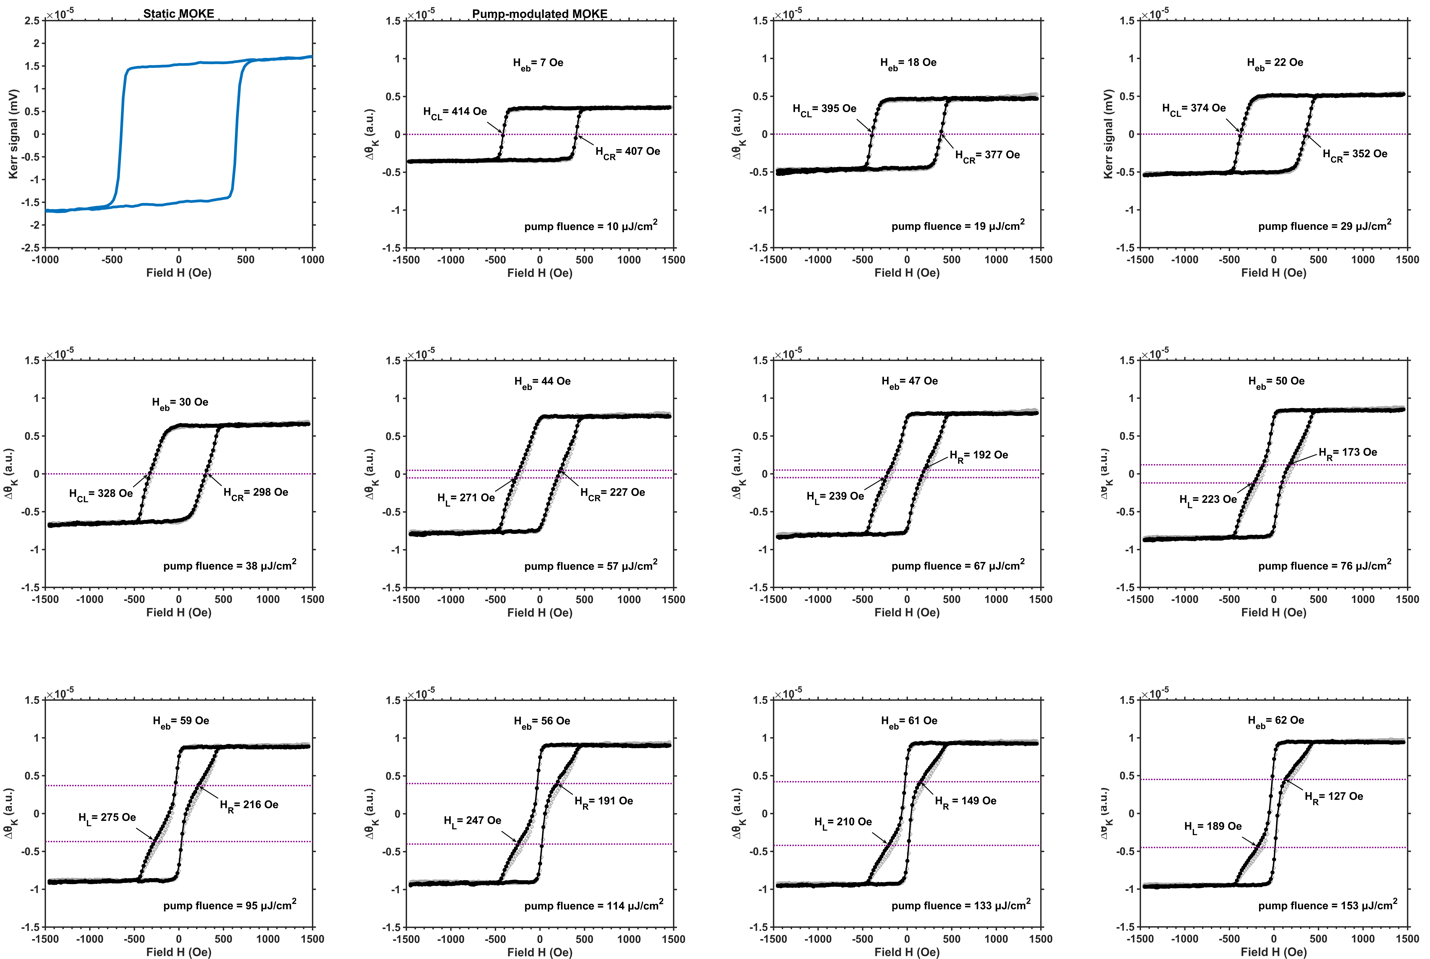


**Figure S2 | Pump-fluence dependent transient MOKE data.** Pump-modulated MOKE hysteresis loops with a variety of pump fluences and the static MOKE loop with the same experimental configuration. The loop develops from a uniform shape at the lower pump fluences to a spin-valve-like shape at the higher pump fluences**.** The dashed purple lines indicate where the maximum exchange biased field is extracted.


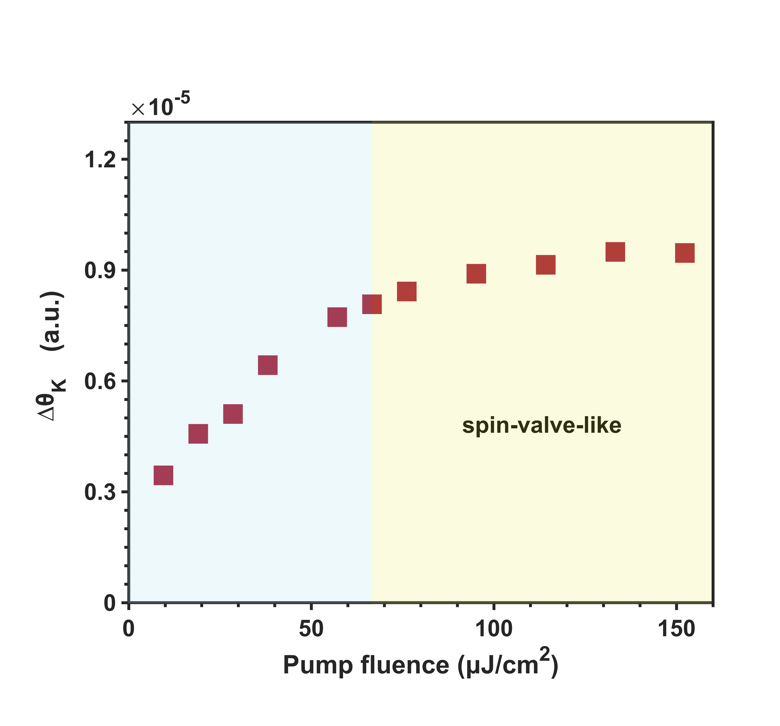


**Figure S3 | Pump-fluence dependent transient MOKE strength.** Magnitude of transient MOKE signal as a function of pump fluence. The solid squares are the heights of pump-modulated MOKE loops. The yellow shade corresponds to the region of spin-valve-like hysteresis loops.

**Estimation of the thermal effect and photoinjected carrier density**

The 2nm thin Al2O3 cap-layer with a high transmission at an 800-nm wavelength (greater than 95%) is considered to be transparent. The estimated reflection of Sb2Te3 single crystal is = 50%.[1,2] The estimated extinction coefficient for Sb2Te3 thin film is = 3, [3,4] and the absorption coefficient at 800 nm is derived as ~ 0.047 nm-1. The laser system delivers pulses with an energy of 4 at 1000-mW power output and therefore the pump energy is 0.192 with the maximum power output of 48 mW irradiating on the sample. The effective pump beam radius is = 0.2 mm and the maximum pump fluence is 153 J/cm2. Within the first several hundred femtoseconds or first few picoseconds after the laser pulse, electrons are excited to a high temperature and then the energy is transferred to the lattice through electron-electron and electron-phonon scattering. The estimation of the temperature increase is given by

where *D* is the length of absorption, = 6.5 g/cm3 and = 626 is the density and molecular weight of Sb2Te3, respectively, 110 J∙mol-1K-1 is the averaged special heat capacity, and is the effective irradiation area. the limits of a zero and full reflection of light passing through the MTI layer, the estimated increase Considering of temperature with a pump fluence of 153 J/cm2 is in the range of = 26 42 K with *D* = 10 nm and 20 nm correspondingly. Next, the density of holes generated by photons absorbed in the MTI surface layer is estimated by

where = 10 nm is the thickness of the MTI layer, = 0.43 nm is the thickness of surface-state layers and = 1.55 eV is the photon energy. Similarly, with *L = d* and *L = d+*, the estimated photoexcited surface hole density is with a pump fluence of 153 J/cm2.

**Reproducibility of pump-modulated MOKE measurements**

The same pump-modulated MOKE measurements taken after the highest pump fluence experiment show similar results which indicates that the sample has not been damaged by the pump excitations in our study.

**References**

1. Shaik, M. & Motaleb, I. A. Investigation of the optical properties of PLD-grown Bi2Te3 and Sb2Te3. *IEEE EIT 2013* (2013).
2. Sobolev, V. V. *et al*. Reflectivity Spectra of the Rhombohedral Crystals Bi2Te3, Bi2Se3, and Sb2Te3 over the Range from 0.7 to 12.5 eV. *Phys. Status Solidi B* **30**, 349–355 (1968).
3. Park, J.-W. *et al*. Optical properties of (GeTe, Sb2Te3) pseudobinary thin films studied with spectroscopic ellipsometry. *Appl. Phys. Lett.* **93**, 021914 (2008).
4. Lawal, A. *et al*. Sb2Te3 crystal a potential absorber material for broadband photodetector: A first-principles study. *Results Phys*. **7**, 2302–2310 (2017).
